# Supplementary material
Source: MDPI journal article supplement (https://www.mdpi.com/2227-9717/10/5/875)
Supplement: s1 [file s1]

# Coating process of honeycomb cordierite support with Ni/boehmite gels

Vincent Claude <sup>1</sup>, Julien G. Mahy <sup>1,2\*</sup>, Timothée Lohay <sup>1</sup>, Jérémy Geens<sup>1</sup>, and Stéphanie D. Lambert <sup>1,2\*</sup>

<sup>1</sup> Department of Chemical Engineering – Nanomaterials, Catalysis, Electrochemistry, B6a, University of Liège, B-4000 Liège, Belgium; vincent.claude.bbri@gmail.com (V.C. and T.L.), j.geens@uliege.be (J.G.),

<sup>2</sup> Fonds de la Recherche Scientifique (FNRS), Rue d'Egmont 5, 1000 Bruxelles, Belgium

\* Correspondence: julien.mahy@uliege.be (J.G.M.), stephanie.lambert@uliege.be (S.D.L.); Tel.: +32 4 3664771

## 1. Characterizations of the bare honeycomb support

Figure S1 represents the nitrogen adsorption-desorption isotherms of the honeycomb cordierite support corresponding to microporous solid.

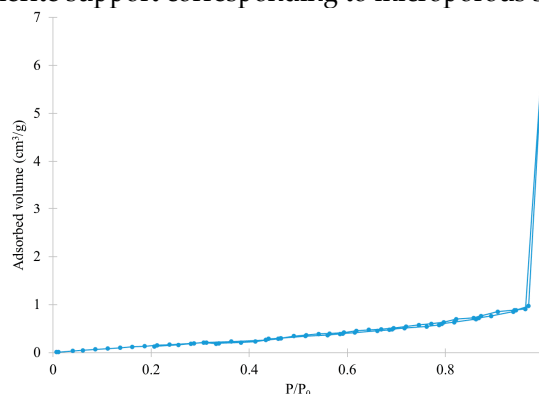

**Figure S1.** Cordierite monolith nitrogen adsorption-desorption isotherms.

Figure S2 is a SEM picture of the support.

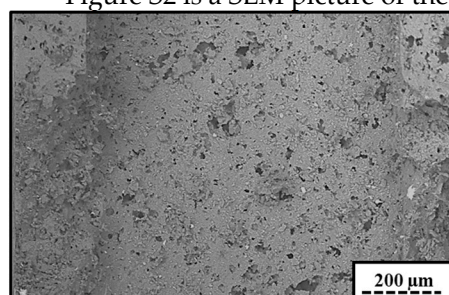

**Figure S2.** Cordierite channel surface (front view) obtained with SEM-BSE at 100 X magnification.

Figure S3 depicts the mercury porosimetry curve and the corresponding pore size distribution of the cordierite support.

**Citation:** Claude, V.; Mahy, J.G.; Lohay, T.; Geens, J.; Lambert, S.D. Coating Process of Honeycomb Cordierite Support with Ni/Boehmite Gels. *Processes* **2022**, *10*, x. <https://doi.org/10.3390/pr10050875>

Academic Editor: Wang Chuanyi

Received: 21 March 2022

Accepted: 27 April 2022

Published: 28 April 2022

**Publisher's Note:** MDPI stays neutral with regard to jurisdictional claims in published maps and institutional affiliations.

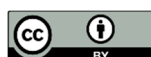

**Copyright:** © 2022 by the authors. Submitted for possible open access publication under the terms and conditions of the Creative Commons Attribution (CC BY) license (<https://creativecommons.org/licenses/by/4.0/>).

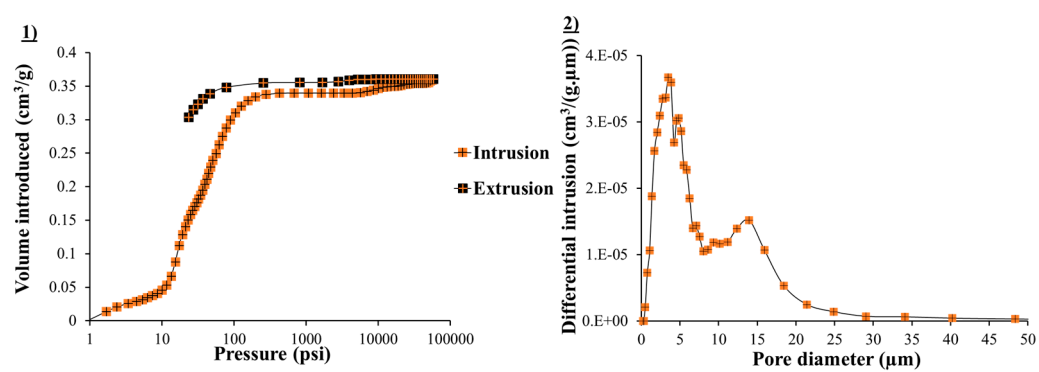

**Figure S3.** Mercury porosimetry curve for the cordierite sample; 1) mercury volume introduced as a function of the pressure, 2) macropore size distribution.
